# Supplementary material for: The genetic effect of the ICAM1 (intercellular adhesion molecule 1) rs5498 polymorphism on the susceptibility towards multiple sclerosis
Source: PubMed Central journal article supplement (PMC6294617; doi:10.1042/bsr20181642), 2018-12-11
Supplement: bsr20181642_Supp1.pdf [file bsr20181642_Supp1.pdf]

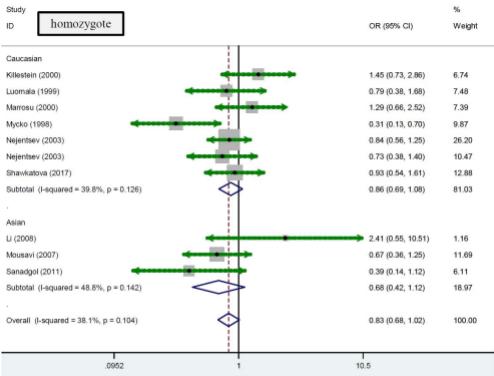

**Figure S1**

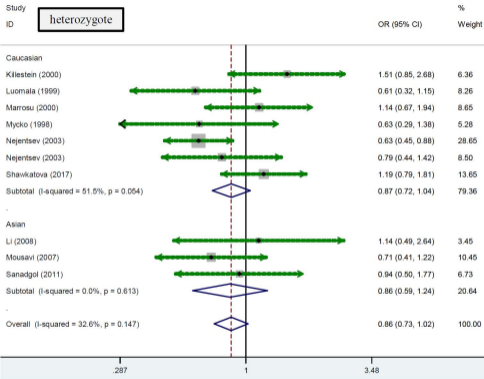

**Figure S2**

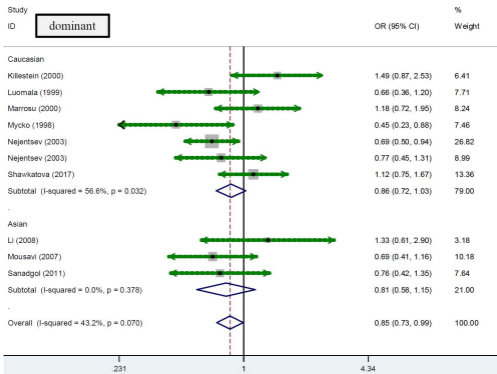

**Figure S3**

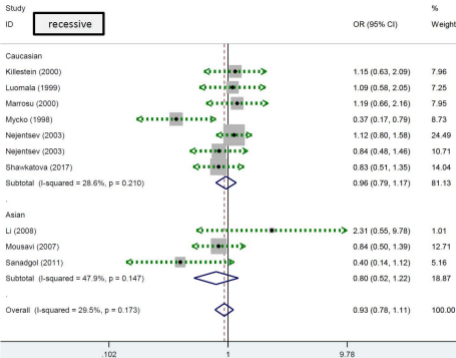

**Figure S4**

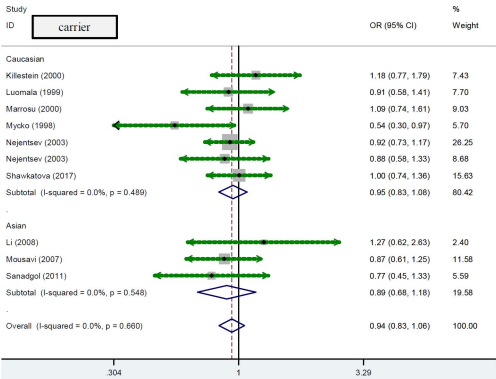

**Figure S5**

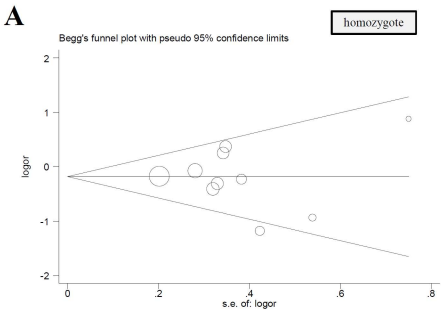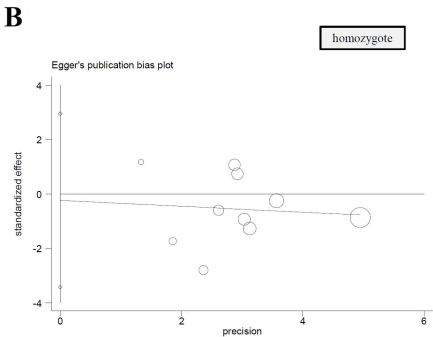

**Figure S6**

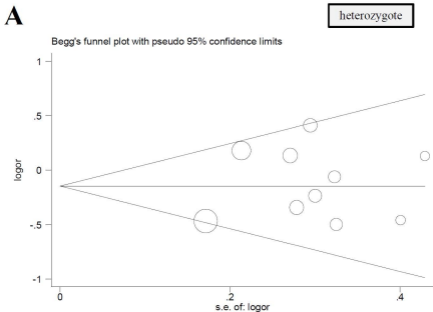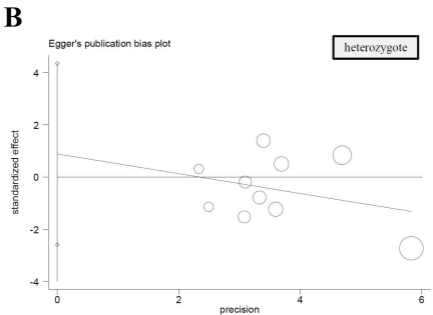

**Figure S7**

**A**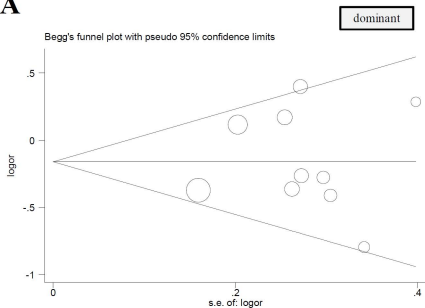**B**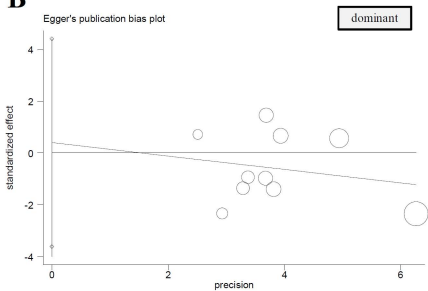**Figure S8**



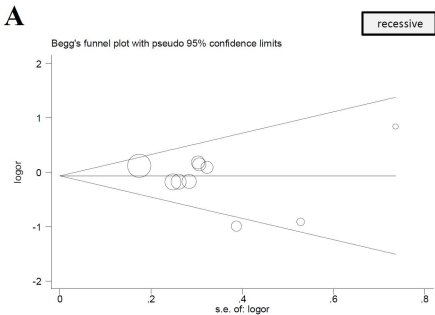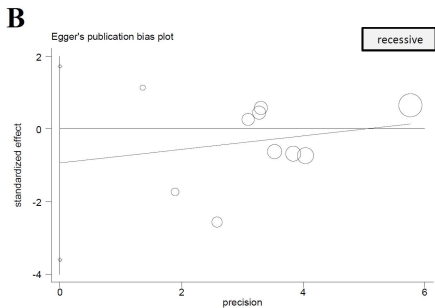

**Figure S9**

**A**

carrier

Begg's funnel plot with pseudo 95% confidence limits

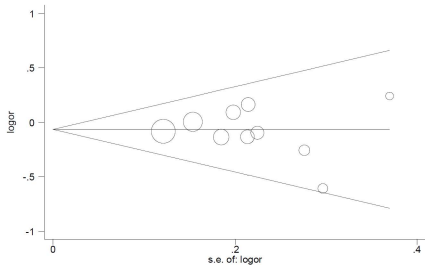**B**

carrier

Egger's publication bias plot

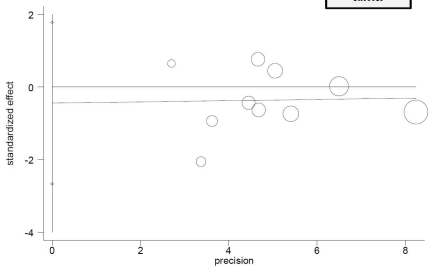**Figure S10**
